# Supplementary material
Source: Royal Society of Chemistry journal article supplement (doi:10.1039/d6mh00022c)
Supplement: d6mh00022c1.pdf [file d6mh00022c1.pdf]

## Supporting Information

### Thermoresponsive Hydrogel-Powered Zero-Energy Greenhouse: Intelligent Shading and Water Irrigation

Xinrui Wu<sup>a</sup>, Xingyu Liu<sup>b</sup>, Songlin Peng<sup>a</sup>, Shuai Tan<sup>a</sup>, Caihong Wang<sup>a\*</sup>

<sup>a</sup>College of Chemical Engineering, Sichuan University, No. 24 South Section 1, Yihuan Road, Chengdu 610065, China.

<sup>b</sup>School of Automation, Chongqing University, No. 55 Daxuecheng South Road, Chongqing 401331, China.

\*E-mail: [wangcaihong@scu.edu.cn](mailto:wangcaihong@scu.edu.cn)

### 3 Figures

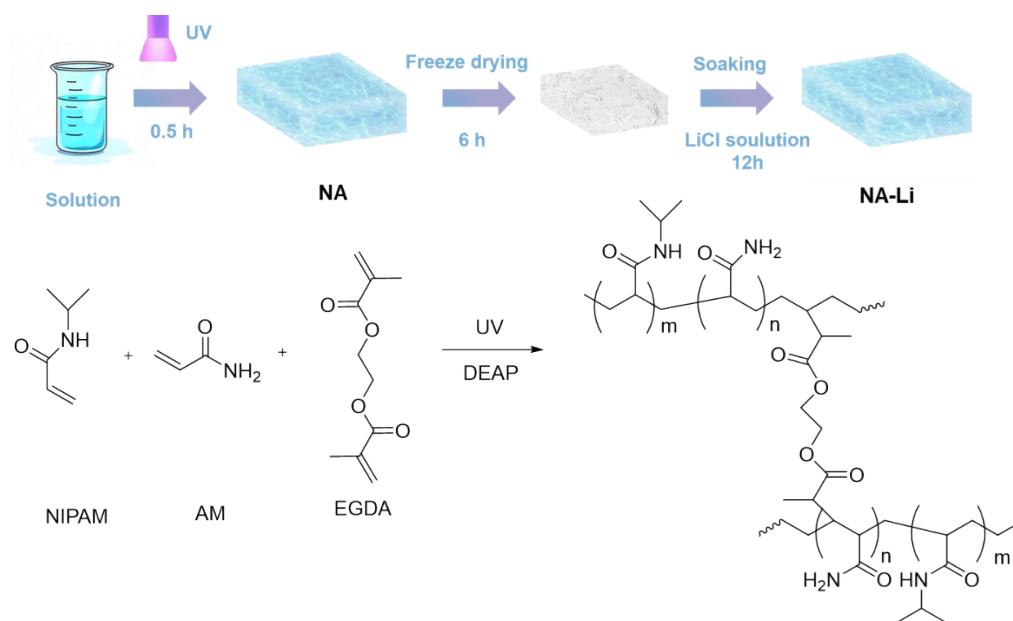

**Figure S1.** Schematic representation of the fabrication process of NA-Li hydrogel.

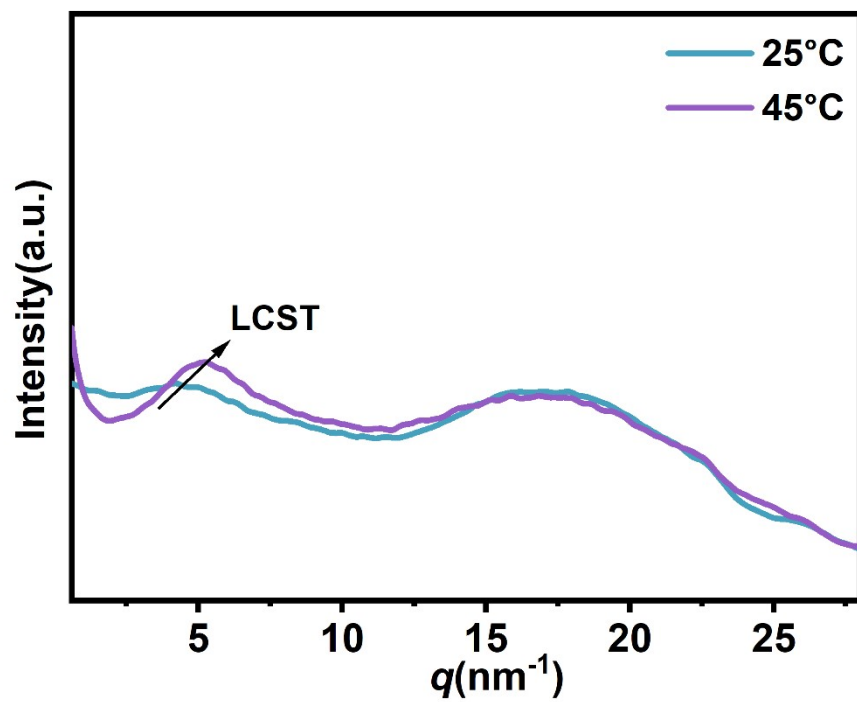

Figure S2. SAXS curves of the NA-Li hydrogel at 25 °C and 45 °C.

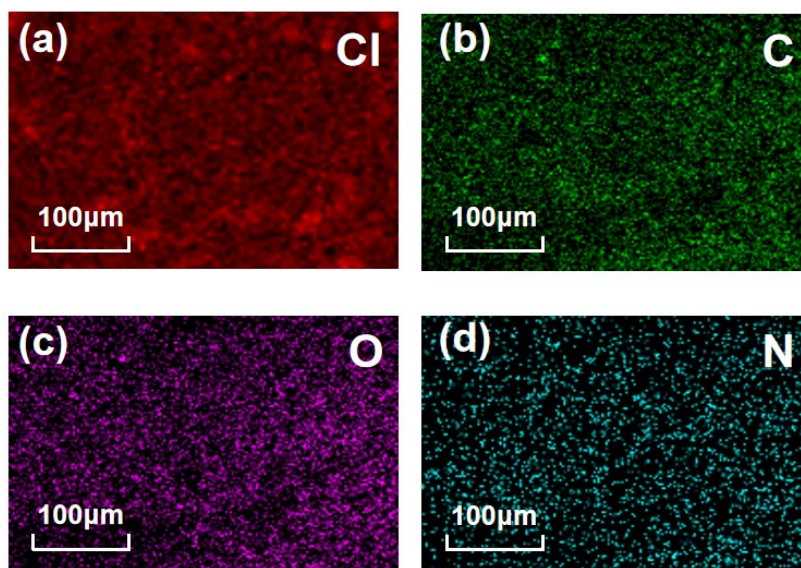

**Figure S3.** EDS elemental mapping showing the uniform distribution of Cl(a), C(b), O(c) and N(d) elements of the dry Na-Li.

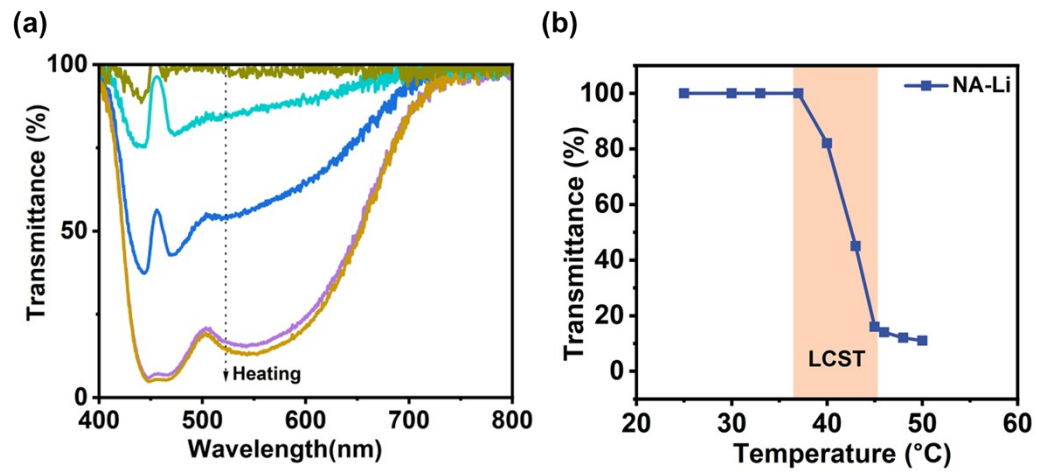

**Figure S4.** Temperature-dependent transmittance changes of Na-Li hydrogel upon heating process at a home-made setup (a) and the corresponding transmittance changes at 520nm (b).

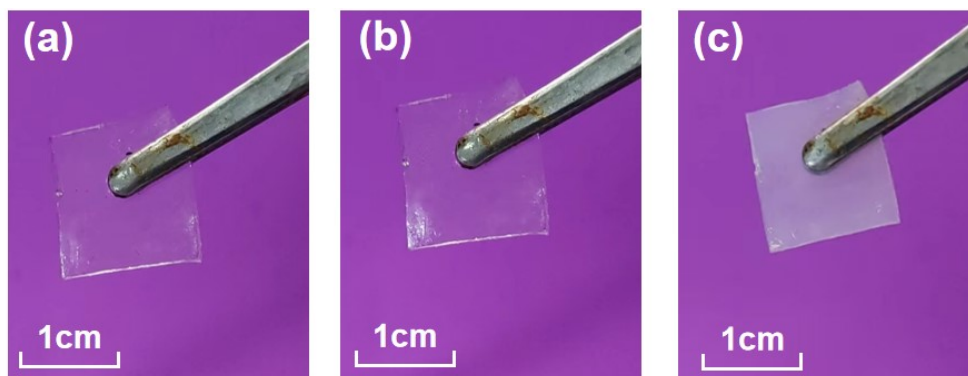

**Figure S5.** The digital photos of NA-Li at the temperatures of  $-25^{\circ}\text{C}$ (a),  $25^{\circ}\text{C}$ (b) and  $45^{\circ}\text{C}$ (c).

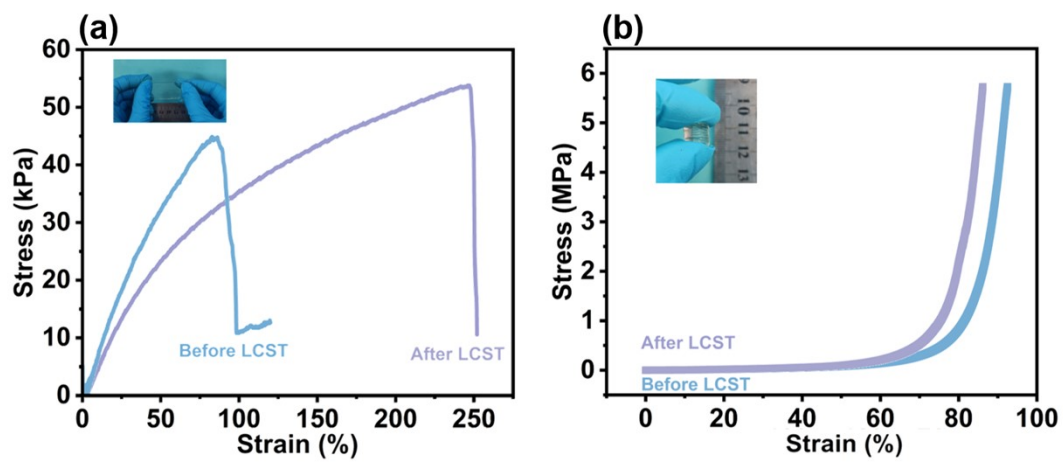

**Figure S6.** The stretch curves (a) and compression curves (b) of Na-Li before LCST and after LCST.

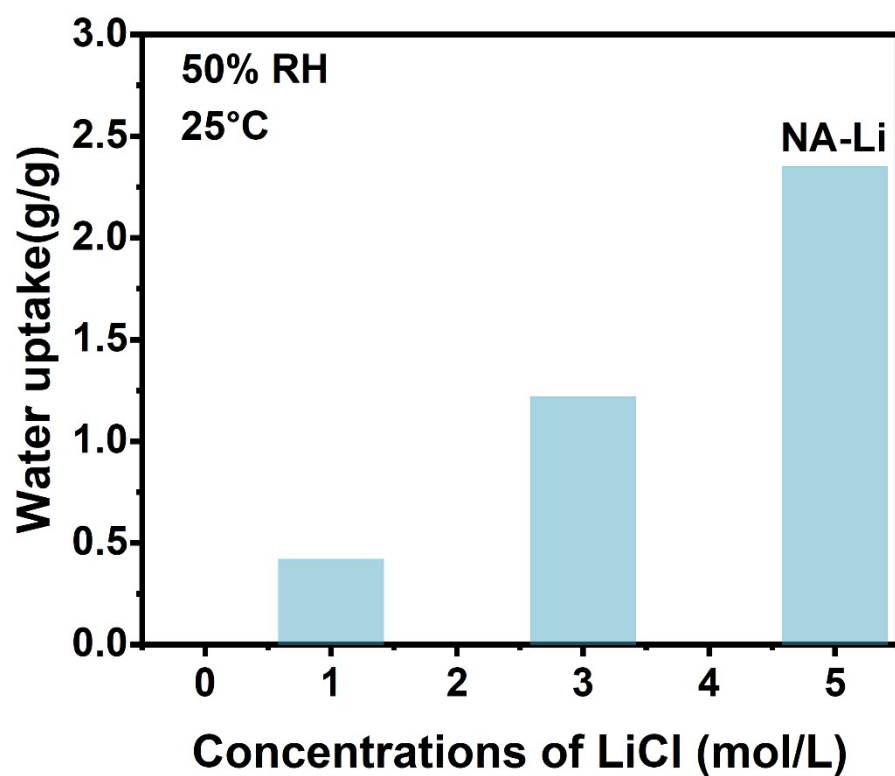

Figure S7. Water uptake of the dry NA-Li absorbents as the concentrations of LiCl are 1, 3 and 5 mol/L, respectively.

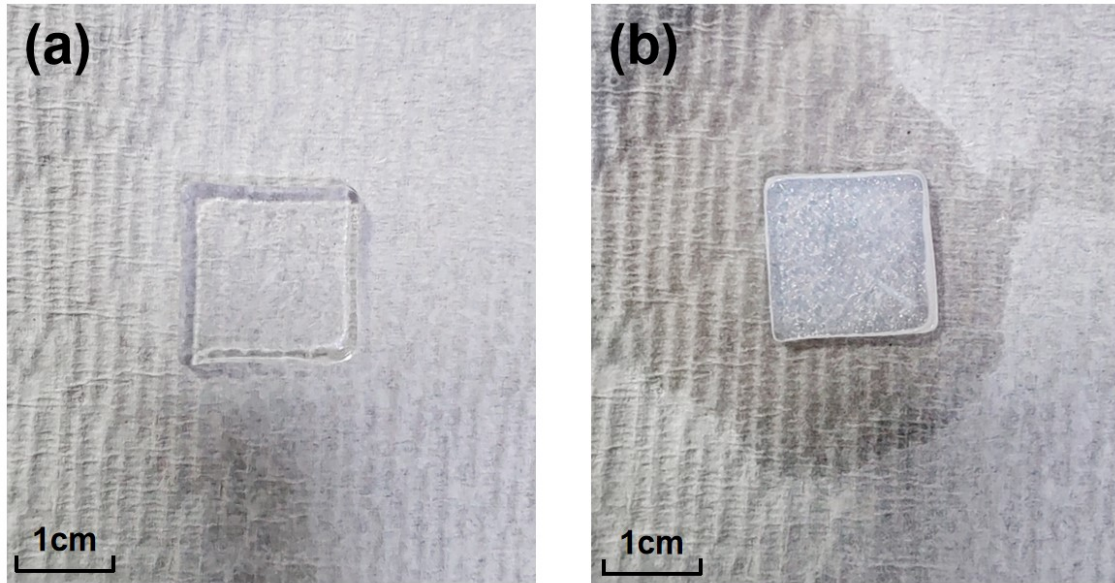

**Figure S8.** The pictures of NA-Li wetting the tissue: before LCST(a) and after LCST(b).

The NA-Li at 45°C enables a rapid wetting of the tissue based on LCST switchable water generation process.

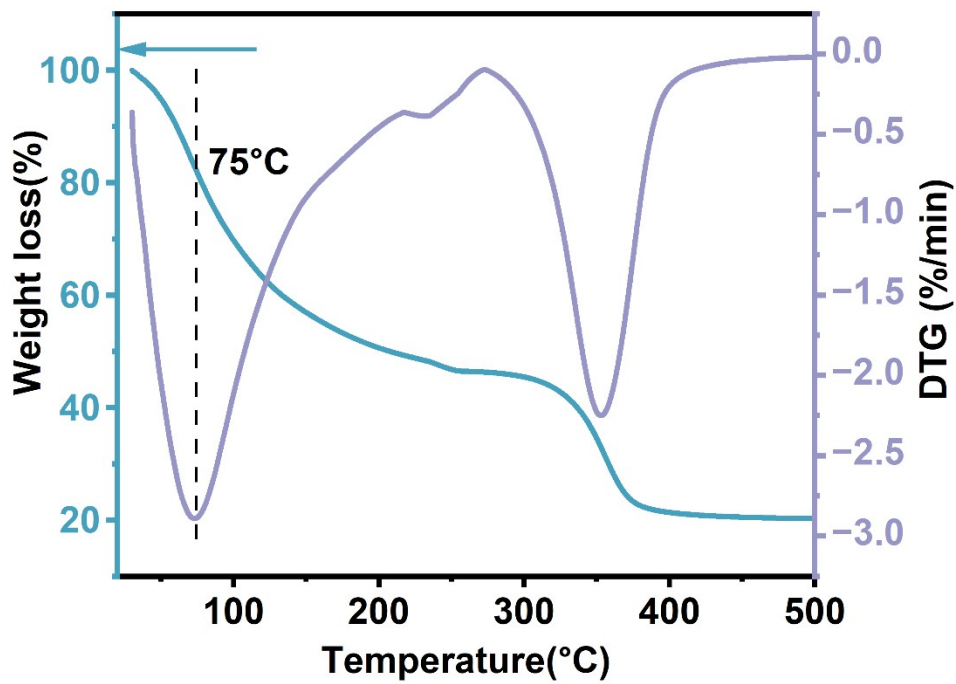

**Figure S9.** The TGA and DTG curves of NA-Li upon heating process at a rate of 5 °C/min.

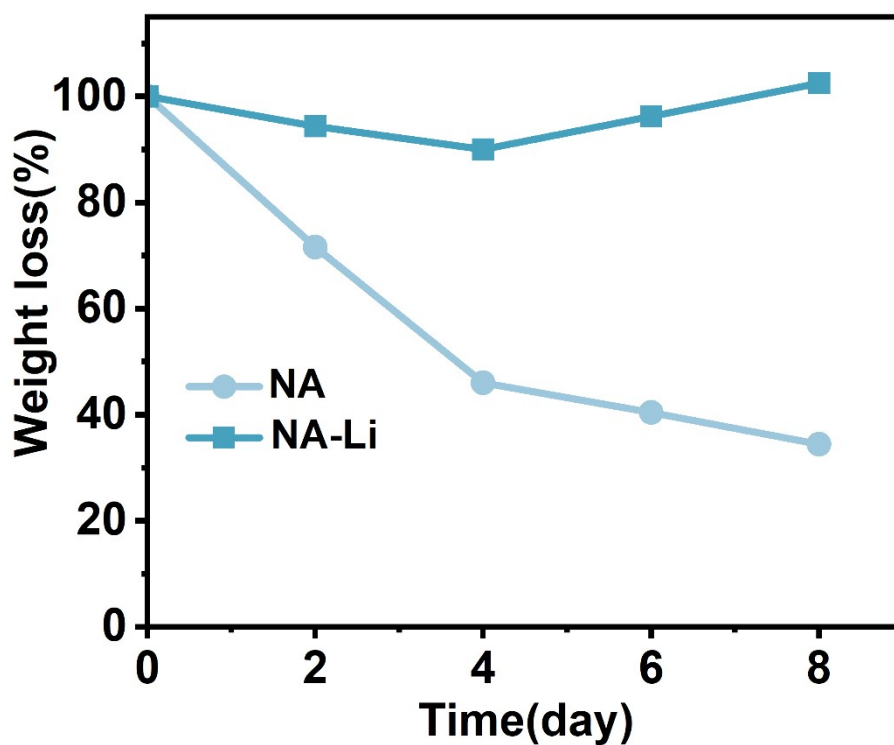

**Figure S10.** The weight loss of NA-Li and NA during eight days.

The weight of NA-Li remains dynamic changes with a fluctuation of  $\pm 8\%$ , which might be from the RH-dependent water absorption properties. In contrast, the NA hydrogel without LiCl rapidly lost the weight every day, since there is barely no moisture absorption ability.

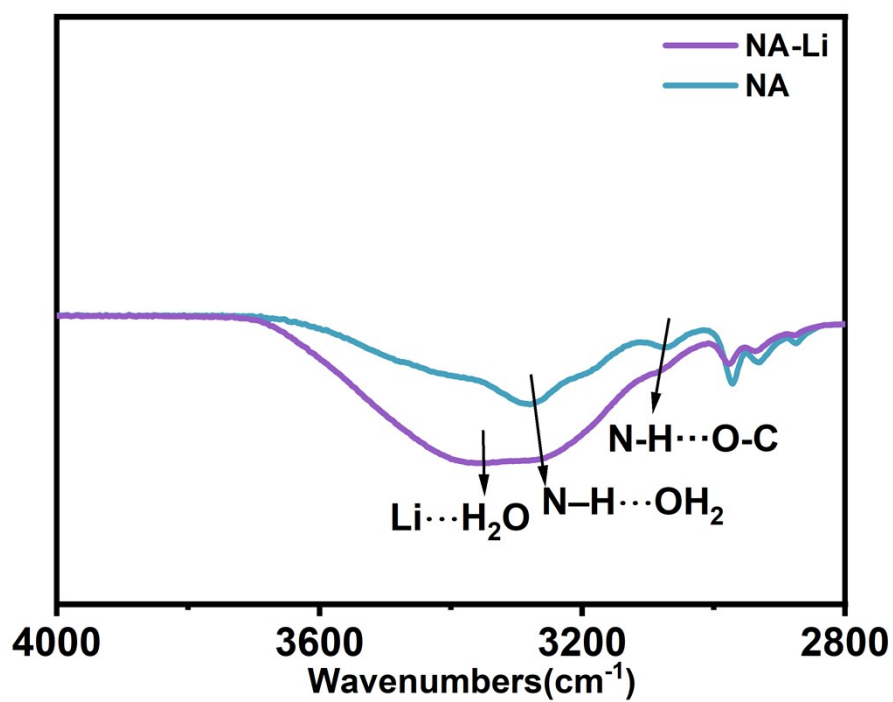

**Figure S11.** The FT-IR curves in the water region of NA-Li and NA at room temperature.

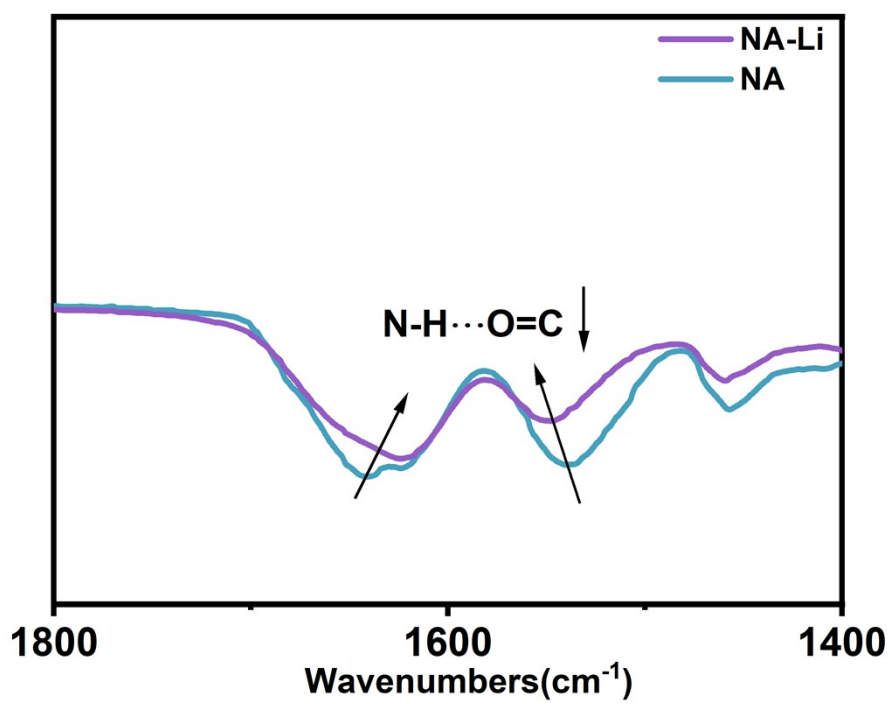

**Figure S12.** The FT-IR curves in the C=O region of NA-Li and NA at room temperature

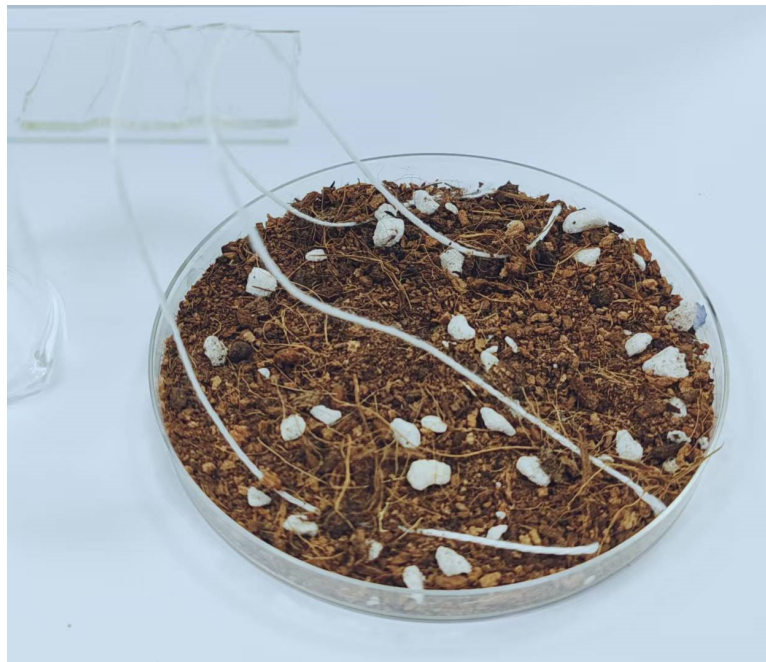

**Figure S13.** The water collection and transport pictures of NA-Li by sewing the cotton thread in the NA-Li hydrogel.

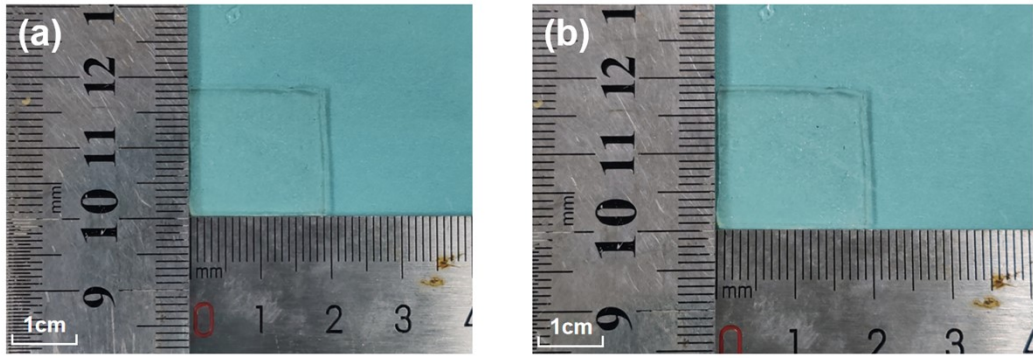

**Figure S14.** The pictures of the NA-Li hydrogel before (a) and after (b) one year

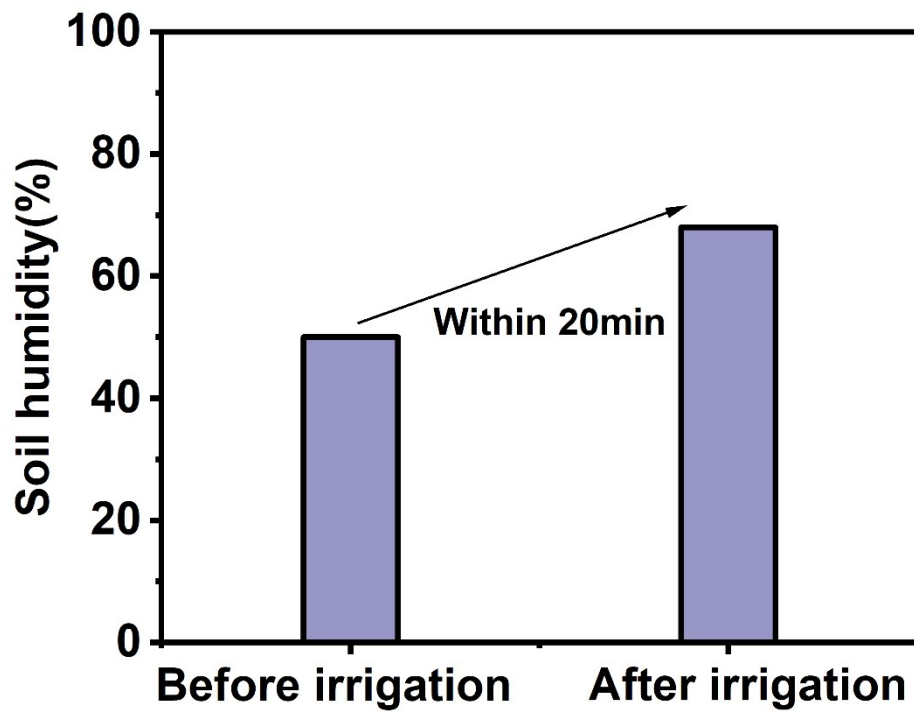

**Figure S15.** Increased soil humidities from 51 to 68% from the water desorption process of the NA-Li.

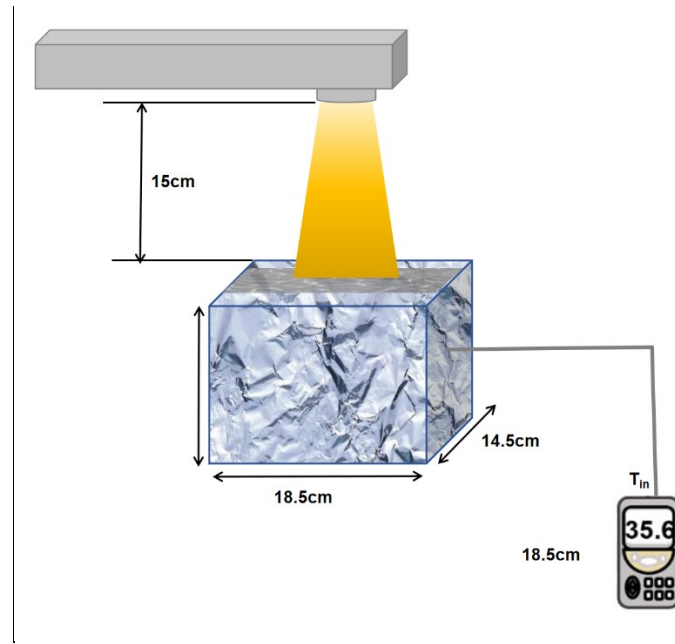

**Figure S16.** Schematic illustration of the model house under simulated sunlight with an intensity of 1.0 Sun.

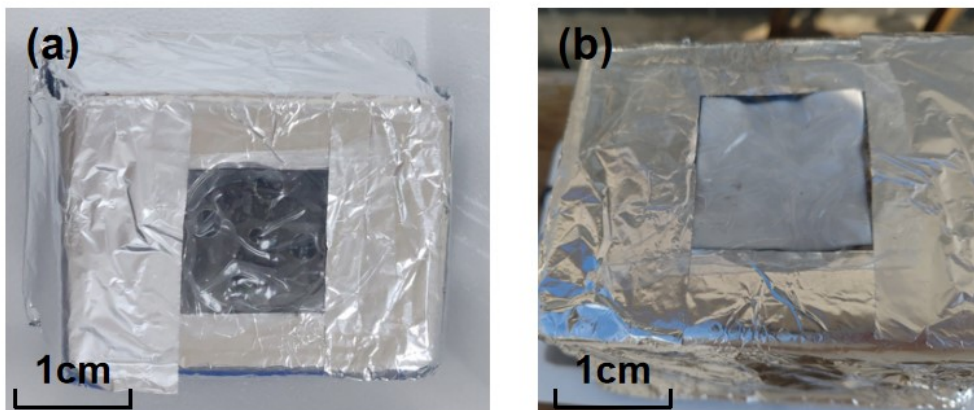

**Figure S17.** The digital photos of the NA-Li window with switchable turbidity changes: before LCST(a) and after LCST(b) under real sun irradiation.

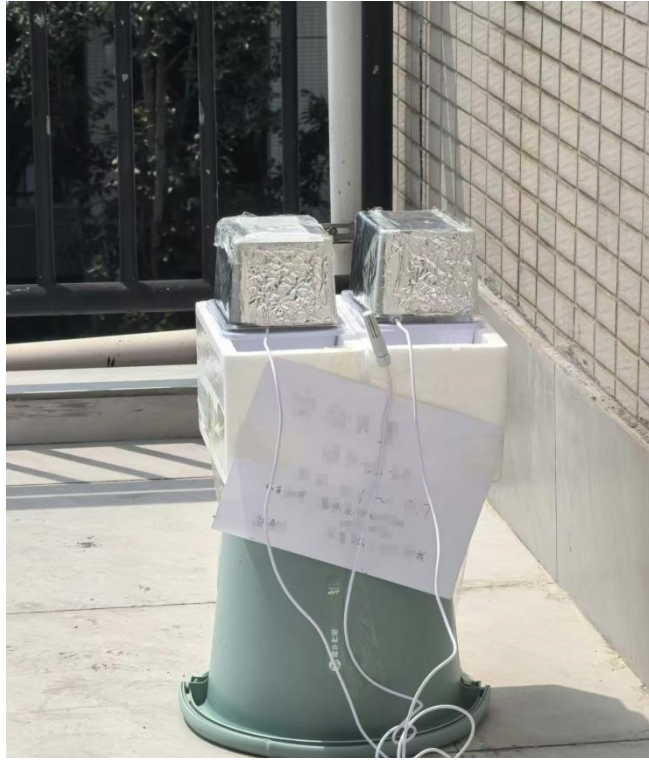

**Figure S18** The digital photo of the outdoor experiment in Chongqing.

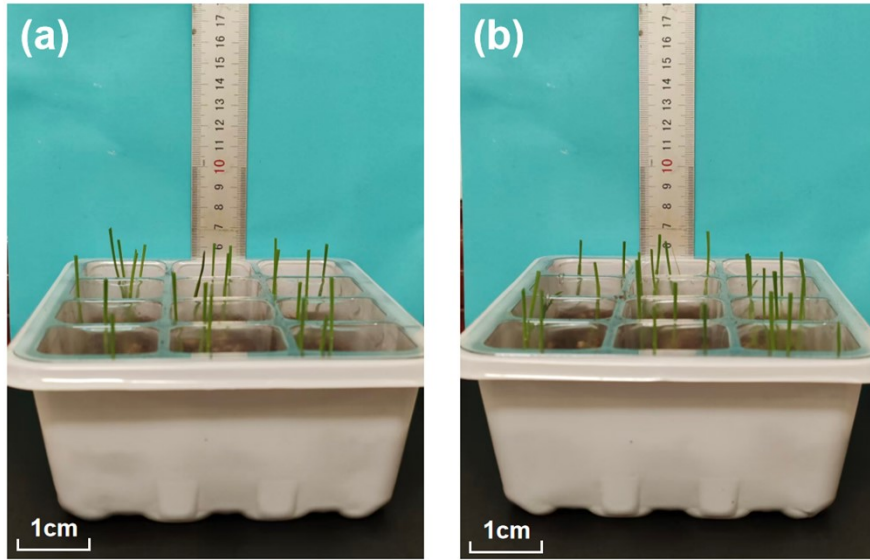

**Figure S19** The *Hordeum vulgare* germinated indoors for 3 days: (a) the samples for PVC covered greenhouse; (b) the samples for Na-Li covered greenhouse.

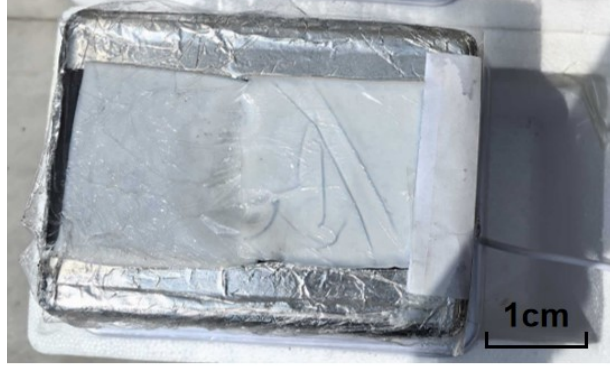

**Figure S20.** The turbid NA-Li window under the natural sun irradiation for greenhouse experiment.

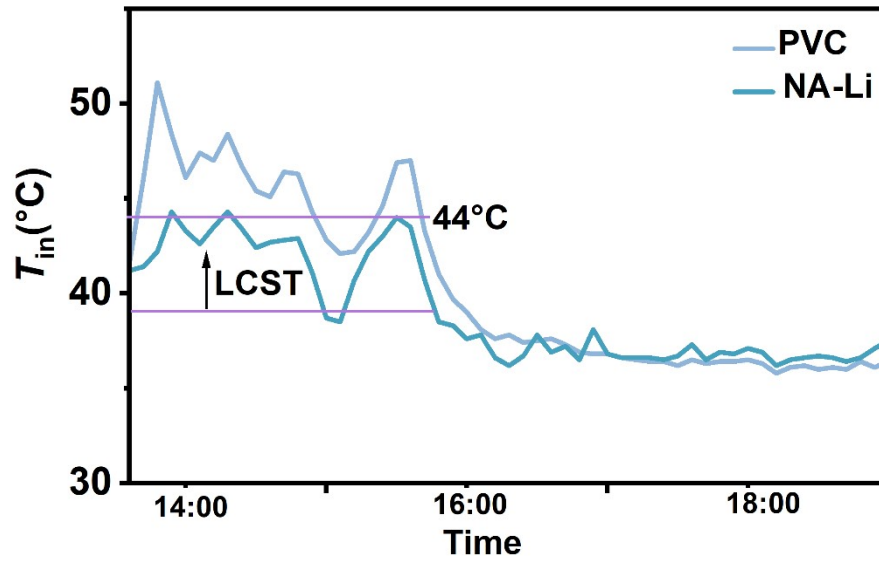

**Figure S21.** The inner temperature changes for PVC and NA-Li greenhouses during afternoon on 0905, 2025 in Chongqing, China.

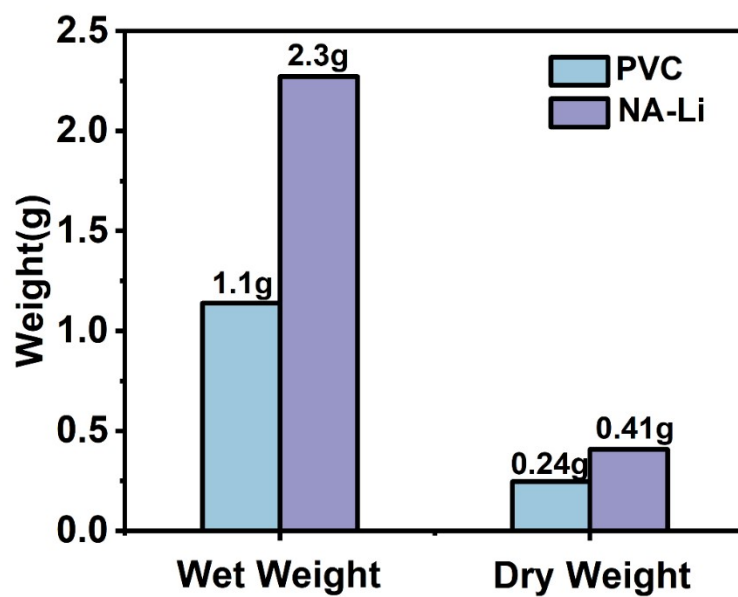

**Figure S22** The wet and dry weights of *Hordeum vulgare* under NA-Li and PVC covered greenhouses, respectively.

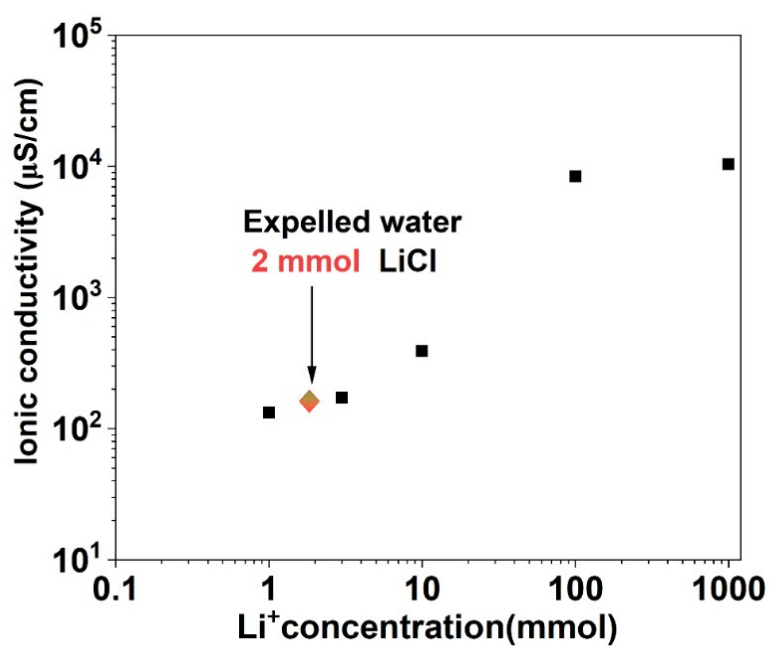

**Figure S23** The ionic conductivity of the LiCl aqueous at various concentrations from 1 mmol to 1 mol.

**Table S1** Water adsorption and desorption performance in comparing with reported literatures.

| <b>Materials</b>             | <b>RH /Temperature</b> | <b>Water uptake (g/g)</b> | <b>Water uptake rate (g/g·h)</b> | <b>Desorption water (g/g)</b> | <b>Desorption water rate (g/g·h)</b> | <b>References</b> |
|------------------------------|------------------------|---------------------------|----------------------------------|-------------------------------|--------------------------------------|-------------------|
| CNF-LiCl                     | 30%/25°C               | 0.73                      | 0.061                            | Liquid (0.4)                  | 0.2                                  | 1                 |
| MXene/CNF/LiCl               | 30%/30°C               | 1.14                      | N/A                              | Vapor (1.08)                  | N/A                                  | 2                 |
| CNFN/LiCl                    | 30%/25°C               | 1.36                      | 0.25                             | Vapor (N/A)                   | N/A                                  | 3                 |
| PIL/PNIPAm/LiCl              | 30%/25°C               | 1.08                      | 0.43                             | Vapor (0.82)                  | 0.41                                 | 4                 |
| CNF/LiCl                     | 45%/25°C               | 1.70                      | 0.28                             | N/A                           | N/A                                  | 5                 |
| COF/LiCl                     | 45%/25°C               | 0.37                      | 0.15                             | Vapor (0.37)                  | 0.37                                 | 6                 |
| PNIPAm/LiCl/CN               | 30%/25°C               | 3.96                      | 0.56                             | Vapor (2.89)                  | 0.96                                 | 7                 |
| PNIPAm/HPC/LiCl              | 70%/25°C               | 1.45                      | 0.15                             | Vapor (N/A)                   | N/A                                  | 8                 |
| PNIPAm/PPy/CaCl <sub>2</sub> | 40%/25°C               | 2.50                      | 0.25                             | Vapor (2.5)                   | 2.5                                  | 9                 |
| HPC/LiCl/TiN                 | 60%/30°C               | 1.79                      | 1.79                             | Vapor (1.79)                  | 3.5                                  | 10                |
| <b>PNIPAm/AM/LiCl</b>        | <b>40%/25°C</b>        | <b>1.93</b>               | <b>0.32</b>                      | <b>Liquid (1.0)</b>           | <b>1.0</b>                           | <b>This work</b>  |

N/A means unknown

**Table S2** Overall performance in comparing with previously reported SAWH in greenhouse.

| Name                  | AWH capacity (g g <sup>-1</sup> ) | Water-saving capacity (g m <sup>-2</sup> ) | Energy consuming    | Plant safety      | Optical control | References      |
|-----------------------|-----------------------------------|--------------------------------------------|---------------------|-------------------|-----------------|-----------------|
| SmartFarm             | 2.24                              | 746.7                                      | Passive             | Minor Harm        | No              | 11              |
| CaCl <sub>2</sub> @SG | 0.71                              | 483                                        | Very high           | No harm           | No              | 12              |
| WEC <sup>2</sup> P    | 0.57                              | 629.6                                      | High                | Almost No Harm    | No              | 13              |
| TEAD                  | 3.38                              | 1832.5                                     | Passive             | No harm           | No              | 9               |
| PDA@PP-Cl             | 1.61                              | 1420                                       | Passive             | Minor Harm        | Yes             | 14              |
| <b>LCST/LiCl</b>      | <b>1.3</b>                        | <b>1020</b>                                | <b>Very passive</b> | <b>Minor Harm</b> | <b>Yes</b>      | <b>Our work</b> |

## References

- 1 P. Zhu, Z. Yu, H. Sun, D. Zheng, Y. Zheng, Y. Qian, Y. Wei, J. Lee, S. Srebnik, W. Chen, G. Chen and F. Jiang, *Advanced Materials*, 2024, **36**, 2306653.
- 2 C. Cai, Y. Chen, F. Cheng, Z. Wei, W. Zhou and Y. Fu, *ACS Nano*, 2024, **18**, 4376–4387.
- 3 Q. Nan, C. Yin, R. Tian, J. Zhang, J. Wang, C. Yan, J. Zhang, J. Wu and J. Zhang, *ACS Nano*, 2025, **19**, 16696–16705.
- 4 J. Sun, F. Ni, J. Gu, M. Si, D. Liu, C. Zhang, X. Shui, P. Xiao and T. Chen, *Advanced Materials*, 2024, **36**, 2314175.
- 5 M. Dai, F. Zhao, J. Fan, Q. Li, Y. Yang, Z. Fan, S. Ling, H. Yu, S. Liu, J. Li, W. Chen and G. Yu, *Advanced Materials*, 2022, **34**, 2200865.
- 6 Y. Wang, W. Chen, J. Fu and Y. Liu, *eScience*, 2023, **3**, 100154.
- 7 Y. Li, J. Deng and H. Li, *Applied Thermal Engineering*, 2024, **247**, 123045.
- 8 X. Wang, G. Ma, S. Cui, K. Sun, W. Li and H. Peng, *Small*, 2024, **20**, 2307416.
- 9 H. Zou, X. Yang, J. Zhu, F. Wang, Z. Zeng, C. Xiang, D. Huang, J. Li and R. Wang, *Nat Water*, 2024, **2**, 663–673.

- 10X. Yang, Z. Chen, C. Xiang, H. Shan and R. Wang, *Nat Commun*, 2024, **15**, 7678.
- 11J. Yang, X. Zhang, H. Qu, Z. G. Yu, Y. Zhang, T. J. Eey, Y. Zhang and S. C. Tan, *Advanced Materials*, 2020, **32**, 2002936.
- 12C. Wang, H. Zou, S. Du, D. Huang and R. Wang, *Energy*, 2023, **270**, 126919.
- 13R. Li, M. Wu, S. Aleid, C. Zhang, W. Wang and P. Wang, *Cell Reports Physical Science*, 2022, **3**, 100781.
- 14F. Deng, C. Xiang, C. Wang and R. Wang, *J. Mater. Chem. A*, 2022, **10**, 6576–6586.
